# Supplementary material for: Efficacy and Safety of Intravitreal Aflibercept Injection in Japanese Patients with Neovascular Glaucoma: Outcomes from the VENERA Study
Source: PubMed Central journal article supplement — Adv Ther. 2020 Dec 16;38(2):1106–15. doi: 10.1007/s12325-020-01580-y (PMC7889553; doi:10.1007/s12325-020-01580-y), 2020-12-16
Supplement: 12325_2020_1580_MOESM2_ESM.pdf [file 12325_2020_1580_MOESM2_ESM.pdf]

# List of IRB / 治験審査委員会一覧

Trial Description: BAY 86-5321 Open label study for NVG in Japan

Trial No: 19652

| No.   | 実施医療機関<br>Trial Center                                                                            | 治験審査委員会の名称及び所在地<br>IRB Name and Address                                                                                                                     | 承認日<br>Date of Approval | 委員長の氏名<br>Chairperson | 備考<br>Remarks |
|-------|---------------------------------------------------------------------------------------------------|-------------------------------------------------------------------------------------------------------------------------------------------------------------|-------------------------|-----------------------|---------------|
| 20001 | 福井大学医学部附属病院<br>眼科<br><br>University of Fukui Hospital<br>Ophthalmology                            | 福井大学医学部附属病院治験審査委員会<br>福井県吉田郡永平寺町松岡下合月23-3<br><br>University of Fukui Hospital<br>Institutional Review Board<br>23-3 Kamiaizuki Eihei-ji-cho, Yoshida, Fukui | 2018/8/20               | 秋野 裕信                 |               |
| 20003 | 社会医療法人三栄会ツカザキ病院<br>眼科<br><br>Tsukazaki Hospital<br>Ophthalmology                                  | 医療法人社団心和会足立共済病院<br>治験審査委員会<br>東京都足立区柳原 1-36-8<br><br>Adachi Kyosai Hospital<br>Institutional Review Board<br>1-36-8 Yanagihara, Adachi-ku, Tokyo            | 2018/8/16               | 中本 雅久                 |               |
| 20005 | 国立大学法人大阪大学医学部<br>附属病院<br>眼科<br><br>Osaka University Hospital<br>Department of Ophthalmology       | 大阪大学医学部附属病院治験審査委員会<br>大阪府吹田市山田丘 2-15<br><br>Osaka University Hospital<br>Institutional Review Board<br>2-15, Yamadaoka, Suita, Osaka                        | 2018/10/10              | 藤野 裕士                 |               |
| 20007 | 高槻赤十字病院<br>眼科<br><br>Takatsuki Red Cross Hospital<br>Ophthalmology                                | 高槻赤十字病院治験審査委員会<br>大阪府高槻市阿武野 1-1-1<br><br>Takatsuki Red Cross Hospital<br>Institutional Review Board<br>1-1-1 Abuno, Takatsuki, Osaka                        | 2018/8/17               | 平松 昌子                 |               |
| 20008 | 聖マリアンナ医科大学病院<br>眼科<br><br>St. Marianna University School<br>of Medicine<br>Hospital Ophthalmology | 聖マリアンナ医科大学附属病院等治験審査委員会神奈川県川崎市宮前区菅生 2-16-1St.<br><br>Marianna Univ. Group IRB2-16-1<br>Sugao Miyamae-ku, Kawasaki, Kanagawa                                  | 2018/9/25               | 遊道 和雄                 |               |

| No.   | 実施医療機関<br>Trial Center                                                                  | 治験審査委員会の名称及び所在地<br>IRB Name and Address                                                                                                             | 承認日<br>Date of<br>Approval | 委員長の氏名<br>Chairperson | 備考<br>Remarks |
|-------|-----------------------------------------------------------------------------------------|-----------------------------------------------------------------------------------------------------------------------------------------------------|----------------------------|-----------------------|---------------|
| 20009 | 国立大学法人金沢大学附属病院<br>眼科<br><br>Kanazawa University Hospital<br>Department of Ophthalmology | 金沢大学附属病院<br>受託研究審査委員会<br>石川県金沢市宝町 13-1<br><br>Kanazawa University Hospital<br>Institutional Review Board<br>13-1 Takaramachi, Kanazawa,<br>Ishikawa | 2018/9/13                  | 絹谷 清剛                 |               |
| 20014 | 国立大学法人島根大学医学部<br>附属病院<br>眼科<br><br>Shimane University Hospital<br>Ophthalmology         | 島根大学医学部附属病院臨床研究<br>審査部会<br>島根県出雲市塩冶町 89 番 1<br><br>Shimane University Hospital<br>Institutional Review Board<br>89-1Shioya-cho, Izumo, Shimane      | 2018/9/12                  | 直良 浩司                 |               |
